# Supplementary material for: Experimental evidence for temporal uncoupling of brain Aβ deposition and neurodegenerative sequelae
Source: PubMed Central journal article supplement (PMC9705543; doi:10.1038/s41467-022-34538-5), 2022-11-28
Supplement: 41467_2022_34538_MOESM1_ESM.pdf [file 41467_2022_34538_MOESM1_ESM.pdf]

## SUPPLEMENTARY INFORMATION

### **Experimental evidence for temporal uncoupling of brain A $\beta$ deposition and neurodegenerative sequelae**

Christine Rother<sup>1,2,3,#</sup>, Ruth E. Uhlmann<sup>1,2,3,#</sup>, Stephan A. Müller<sup>4,5,6</sup>, Juliane Schelle<sup>1,2</sup>, Angelos Skodras<sup>1,2</sup>, Ulrike Obermüller<sup>1,2</sup>, Lisa M. Häsler<sup>1,2</sup>, Marius Lambert<sup>1,2</sup>, Frank Baumann<sup>1,2</sup>, Ying Xu<sup>1,2</sup>, Carina Bergmann<sup>1,2,3</sup>, Giulia Salvadori<sup>1,2</sup>, Maarten Loos<sup>7</sup>, Irena Brzak<sup>8</sup>, Derya Shimshek<sup>8</sup>, Ulf Neumann<sup>8</sup>, Dominantly Inherited Alzheimer Network, Lary C. Walker<sup>9</sup>, Stephanie A. Schulz<sup>10</sup>, Jasmeer P. Chhatwal<sup>10</sup>, Stephan A. Kaeser<sup>1,2</sup>, Stefan F. Lichtenthaler<sup>4,5,6</sup>, Matthias Staufenbiel<sup>1</sup>, Mathias Jucker<sup>1,2,\*</sup>

<sup>1</sup>Department of Cellular Neurology, Hertie Institute for Clinical Brain Research, University of Tübingen, D-72076 Tübingen, Germany;

<sup>2</sup>German Center for Neurodegenerative Diseases (DZNE), Tübingen, D-72076 Tübingen, Germany;

<sup>3</sup>Graduate School of Cellular and Molecular Neuroscience, University of Tübingen, D-72074 Tübingen, Germany,

<sup>4</sup>German Center for Neurodegenerative Diseases (DZNE), Munich, Germany

<sup>5</sup>Neuroproteomics, School of Medicine, Klinikum rechts der Isar, Technical University of Munich, Munich, Germany

<sup>6</sup>Munich Cluster for Systems Neurology (SyNergy), Munich, Germany

<sup>7</sup>Sylics (Synaptologics BV), 3721 MA Bilthoven, The Netherlands.

<sup>8</sup>Novartis Institutes for Biomedical Research, CH-4056 Basel, Switzerland.

<sup>9</sup>Department of Neurology and Emory National Primate Research Center, Emory University, Atlanta, GA 30322

<sup>10</sup>Department of Neurology, Massachusetts General Hospital, Boston, MA

### **Supplementary Figures 1-6**

### **Supplementary Table 1**

### **Member List of the Dominantly Inherited Alzheimer Network (DIAN)**

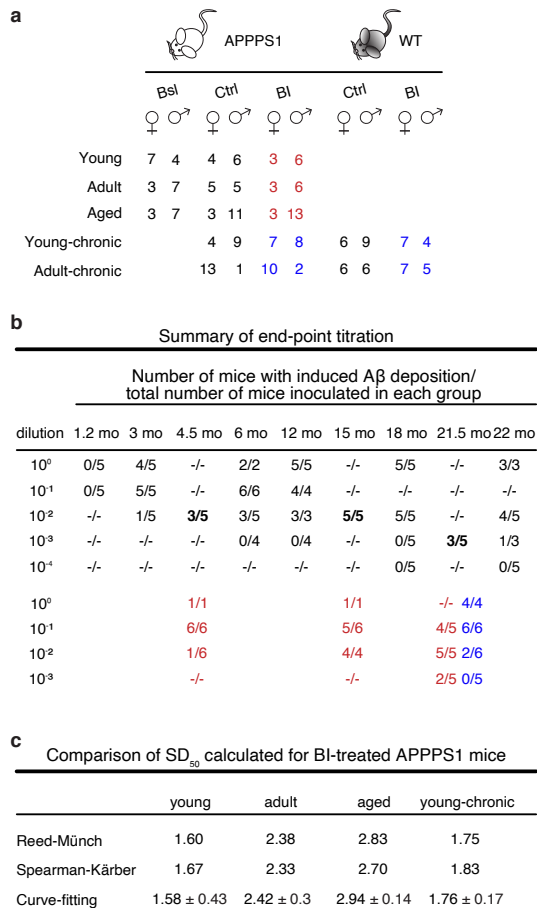

**Supplementary Figure 1. Number and sex of mice per group.** (a) Number of APPPS1 mice and WT mice in the various groups treated with the BACE1-inhibitor (BI), control-treated (Ctrl), or analyzed at baseline (Bsl). See Fig. 1b for group description. The targeted number of mice per group was 10 for the young and adult groups and 12-15 for aged groups (i.e., short-term treatment, aged and chronic treatments). Slight deviations in numbers are the result of mouse availability from our in-house mouse colony or premature death. (Note that there was no difference in deaths between BI- and control-treated mice). Previous research has not revealed an obvious sex difference in CSF NfL or A $\beta$  load in APPPS1 mice<sup>19,59</sup>, and thus both male and female mice were randomly included in the study. (b) Number of mice used for the endpoint titration assay to calculate A $\beta$  seeding dose 50 of brain extracts (SD<sub>50</sub>; see Fig. 3 for details). Shown are the numbers of mice with induced A $\beta$  deposition/total number of mice inoculated per group at each brain extract dilution for the different groups. In the top rows (black) previously published data of untreated APPPS1 mice (number of mice with seeded A $\beta$  deposition/total number of mice in each age group<sup>13</sup>) were incorporated into the present study in line with the 3Rs principles of reducing animal numbers. In bold, animals done in the present study. They were included for comparative analysis with the previously published numbers to make sure that the current and past inoculations results are in the same range. In the bottom rows, the short-term (3 months) BI-treated mice are shown in red while the young-chronic treated mice are shown in blue. Per group, 6-7 mice were inoculated, except for dilutions where seeding could be predicted with high confidence (two dilutions with 1 mouse only). Two groups have only 4 mice due to the death of mice. (c) SD<sub>50</sub> calculations for the BI-treated mice in the present study using three different methods. For curve-fitting the s.e.m. is indicated and curve-fitting was used to generate the curves in Fig. 3c.

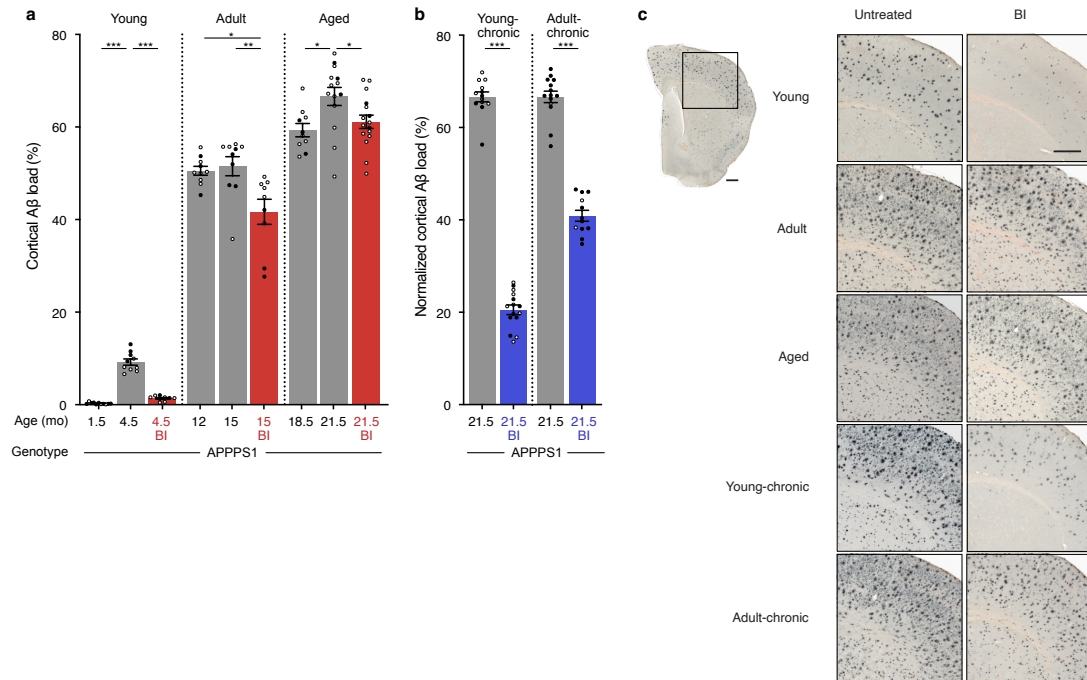

**Supplementary Figure 2. A $\beta$  load assessed by immunostaining after short-term and chronic BACE1 inhibition.** The same mice were used as in Fig. 2 and outlined in Supplementary Fig. 1a. **(a)** Total A $\beta$  immunostaining in neocortex was determined by stereological analysis, and the results mirror brain A $\beta$  load assessed by the immunoassays shown in Fig. 2a. BI treatment caused a significant decrease in A $\beta$  immunostaining compared to the respective age-matched control group (ANOVA, ‘young’:  $F(2, 27)=155.8$ ; ‘adult’:  $F(2, 26)=7.25$ ; ‘aged’:  $F(2, 37)=4.95$ ; all  $P<0.05$ ; *post hoc* Tukey’s multiple comparisons,  $*P<0.05$ ,  $**P<0.01$ ,  $***P<0.001$ ). **(b)** Cortical A $\beta$  immunostaining in the young-chronic and adult-chronic groups was normalized to the 21.5 mo-old control mice of the 3-month treatment group shown in (b). Two-tailed unpaired *t*-tests show significantly lowered A $\beta$ -immunostaining in both groups (‘young chronic’:  $t(26)=30.99$ ; ‘adult-chronic’:  $t(24)=14.77$ ; both  $***P<0.001$ ). All data are represented as group means  $\pm$  s.e.m. Open circles are males, filled circles females; no consistent effect of sex was found (see Methods). **(c)** Representative A $\beta$ -immunostained coronal sections (from sets of every 36<sup>th</sup> section through the neocortex) for each of the BI-treated and untreated control groups. Scale bars: 500 $\mu$ m.

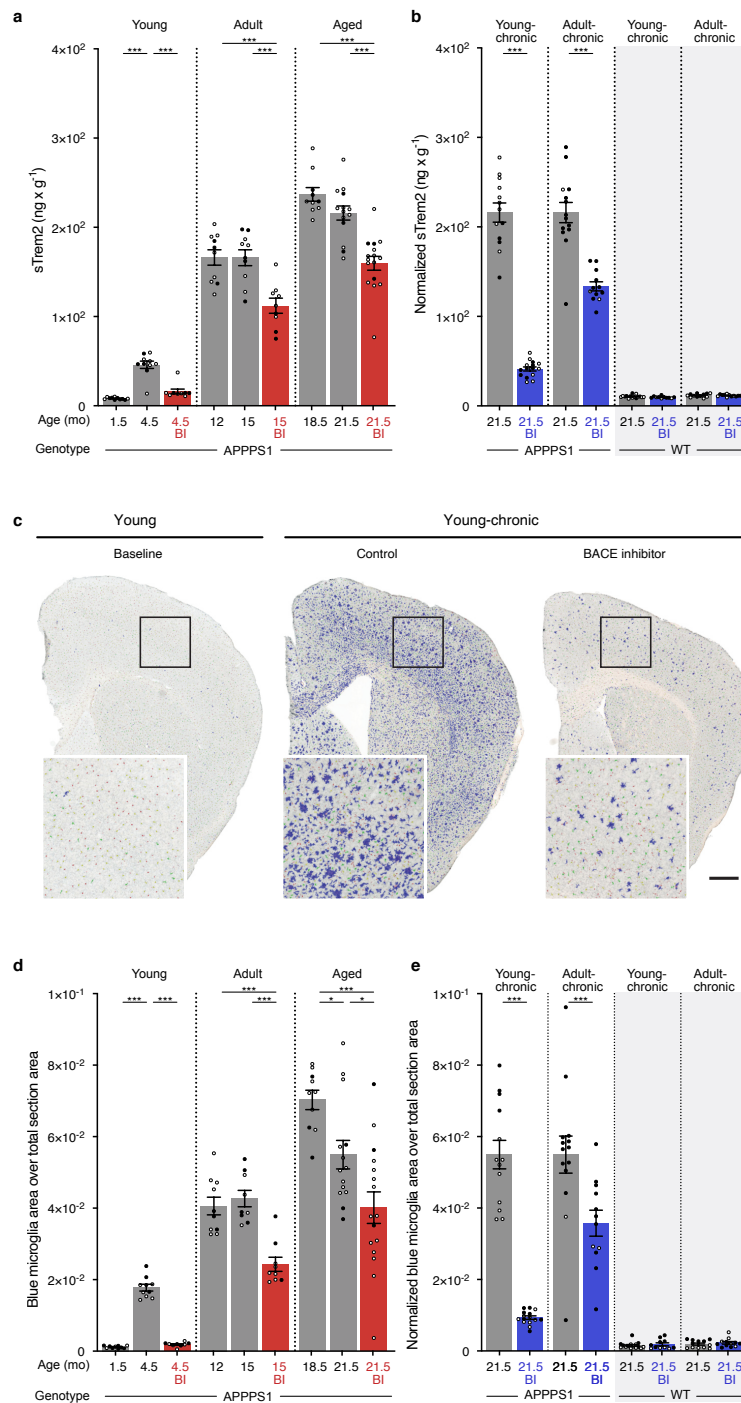

**Supplementary Figure 3. Soluble Trem2 and activated microglia after short-term and chronic BACE1 inhibition.** The same mice were used as in Fig. 2 and outlined in Supplementary Fig. 1a. **(a, b)** Soluble Trem2 and **(c-e)** microglial activation in brains of APPPS1 and WT mice. **(a)** BI treatment for 3 months caused a significant decrease in soluble Trem2 (sTrem2) compared to the respective age-matched control group, and sTrem2 was below baseline in the ‘adult’ and ‘aged’ groups (ANOVA, ‘young’ ( $F(2, 27)= 54.04$ ; ‘adult’  $F(2, 26)= 12.25$ ; ‘aged’  $F(2, 37)= 25.54$ , all  $P<0.001$ ; *post hoc* Tukey’s multiple comparisons,  $***P<0.001$ ). **(b)** Brain sTrem2 in the young-chronic and adult-chronic groups were normalized to the 21.5 mo-old control mice of the 3-month treatment group shown in (a). Two-tailed unpaired *t*-tests revealed significantly lower brain A $\beta$  levels in the BI-treated mice (‘young chronic’:  $t(26)=17.15$ ; ‘adult-chronic’:  $t(24)=6.229$ , both  $***P<0.001$ ). BI treatment of transgene-negative WT mice had no effect on brain sTrem2. **(c)** Iba1-immunostained microglia in the cortex of APPPS1 and WT mice

were categorized and colored based on size: Red: area  $<50\mu\text{m}^2$  (resting); yellow: area 50 to  $<80\mu\text{m}^2$  (resting-intermediate); green: area 80 to  $<120\mu\text{m}^2$  (activated); blue: area  $\geq 120\mu\text{m}^2$  (activated, plaque-associated). Representative sections from a 1.5 mo-old APPPS1 mouse (young baseline), two 21.5 mo-old APPPS1 mice, one control-treated and one BI-treated mouse from 1.5 mo to 21.5 mo of age. Scale bar insert,  $100\mu\text{m}$ . **(d)** Quantitative analysis revealed a significant decrease of the activated (blue) microglia over the total section area in BI-treated mice compared to controls, and additionally below baseline in the ‘adult’ and ‘aged’ groups (ANOVA, ‘young’  $F(2, 26)=279.9$ ; ‘adult’  $F(2, 25)=18.81$ ; ‘aged’  $F(2, 37)=12.85$ , all  $P<0.001$ ; *post hoc* Tukey’s multiple comparisons,  $*P<0.05$ ,  $**P<0.01$ ,  $***P<0.001$ ). Note that one ‘young baseline’ and one ‘adult control’ mouse were excluded because of a processing error. **(e)** Activated (blue) microglia in the young-chronic and adult-chronic groups were normalized to the 21.5 mo-old control mice of the 3-month treatment group shown in (d). Two-tailed unpaired *t*-tests revealed significantly lower brain  $A\beta$  levels in the BI-treated mice (‘young-chronic’ and ‘adult-chronic’  $t(26)=12.11$ ;  $P<0.001$  and  $t(24)=2.948$ ;  $P=0.0070$ , respectively). BI treatment of WT mice had no effect on microglial activation. Note the similarities of the results of sTrem2 and activated microglia to the results for total brain  $A\beta$  (Fig. 2 and Supplementary Fig. 2). All data are represented as group means  $\pm$  s.e.m. Open circles are males, filled circles females; no consistent effect of sex was found (see Methods).

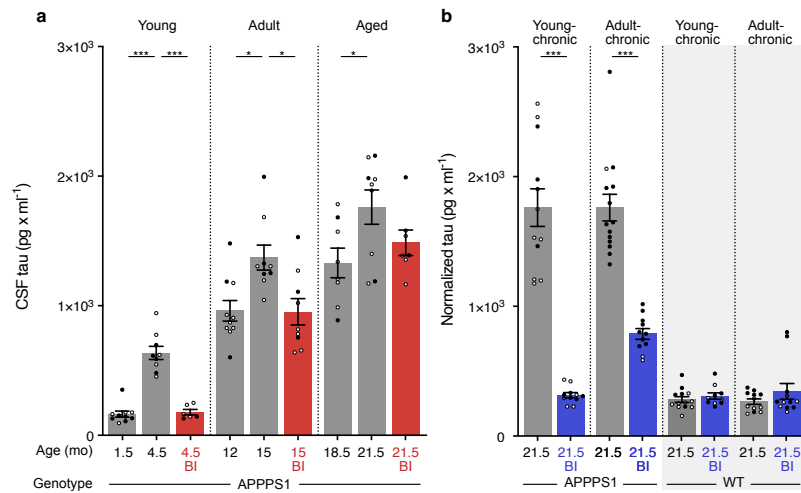

**Supplementary Figure 4. CSF Tau after short-term and chronic BACE1 inhibition.** CSF Tau was measured at baseline and after short-term BI treatment in ‘young’, ‘adult’, and ‘aged’ mice and after chronic treatments (see Fig. 1 and Supplementary Fig. 1a for treatment groups and number of mice per group – however, note that Tau measurements were performed after CSF NfL and CSF proteome measurements for mice with enough CSF remaining. Accordingly, N was 10, 9, 6 for 1.5 mo, 4.5 mo, and BI 4.5 mo; 10, 9, 9 for 12 mo, 15 mo, and BI 15 mo; 8, 9, 7 for aged 18.5 mo, 21.5 mo, and BI 21.5 mo; 12, 11 for young-chronic 21.5 mo and BI 21.5 mo; 14, 11 for adult-chronic 21.5 mo and BI 21.5 mo; 13, 10 for young-chronic WT 21.5 mo and WT BI 21.5 mo; 12, 12 for adult-chronic WT 21.5 mo and WT BI 21.5 mo). **(a)** BI treatment for 3 months completely prevented the Tau increase (note that in the aged group less than half of the CSF samples were left for analysis (ANOVA, ‘young’  $F(2, 22) = 56.19$ ;  $P < 0.001$ ; ‘adult’  $F(2, 25) = 6.664$ ,  $P = 0.005$ ; ‘aged’  $F(2, 21) = 3.552$ ,  $P = 0.05$ ; *post hoc* Tukey’s multiple comparisons,  $*P < 0.05$ ,  $***P < 0.001$ ). **(b)** CSF Tau levels in the young-chronic and adult-chronic groups were normalized to the 21.5 mo-old control mice of the 3-month treatment group shown in (a). In the adult-chronic group, Tau levels were lowered below baseline (i.e. compared to levels at 12 mo of age) while chronic treatment fully prevented an increase in CSF Tau, given the tau levels in WT mice (two-tailed unpaired *t*-tests for ‘young chronic’:  $t(21) = 9.5$ ; ‘adult-chronic’:  $t(23) = 7.973$ , both  $***P < 0.001$ ; ‘young chronic WT’:  $t(21) = 0.7996$ ; ‘adult-chronic WT’:  $t(22) = 1.229$ , both  $P > 0.05$ ). All data are represented as group means  $\pm$  s.e.m. Open circles are males, filled circles females; no effect of sex was found (see Methods).



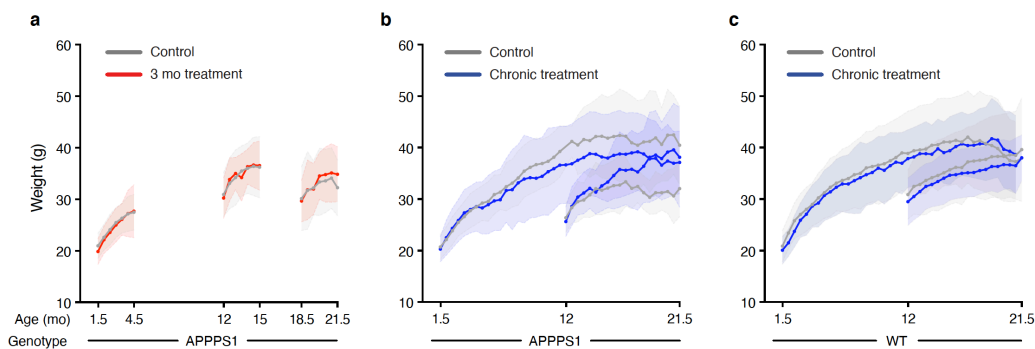

**Supplementary Figure 6. Weekly body weights of BACE1-Inhibitor- and control-treated APPPS1 and wildtype mice.** See Fig. 1b for group description and Supplementary Fig. 1 for mouse numbers. **(a)** No difference in body weight was observed in any of the three age groups of APPPS1 mice treated for 3 months with BI vs. control treatment. Note that, in the ‘aged’ 18.5 – 21.5 mo-old group, seven longitudinal datasets were incomplete. **(b, c)** Body weight of chronically treated young and adult APPPS1 mice **(b)** or non-transgenic WT mice **(c)**. While BI treatment had no robust effect on body weight in the WT mice, apparent opposite changes, depending on the start of the treatment, were noted in the APPPS1 mice. Shown are group means  $\pm$  SD (shaded area). Note that the BI-containing food pellets and control pellets (same pellets without the BI) were more nutritious compared to the standard lab chow, and thus animals tended to gain weight when switched to the BI-containing food pellets and control pellets.



CSF NfL [pg/mL] in

|               |           | Age group            |                        |                           |                          |                             |                            |
|---------------|-----------|----------------------|------------------------|---------------------------|--------------------------|-----------------------------|----------------------------|
|               |           | 1.5 mo               | 3 mo                   | 6 mo                      | 12 mo                    | 18 mo                       | end-stage                  |
| <b>APPPS1</b> |           | <b>63 ±3.4 (n=3)</b> | <b>410 ±30.8 (n=9)</b> | <b>1,255 ±85.8 (n=10)</b> | <b>3,405 ±354 (n=12)</b> | <b>12,475 ±1,446 (n=11)</b> | <b>19,689 ±1,566 (n=9)</b> |
|               |           | 61                   | 529                    | 1,170                     | 4,227                    | 5,775                       | 23,562                     |
|               |           | 58                   | 505                    | 1,330                     | 2,078                    | 14,986                      | 25,004                     |
|               |           | 69                   | 318                    | 1,491                     | 2,727                    | 9,559                       | 21,252                     |
|               |           |                      | 416                    | 981                       | 4,466                    | 22,464                      | 18,015                     |
|               |           |                      | 510                    | 1,631                     | 4,718                    | 9,573                       | 15,134                     |
|               |           |                      | 428                    | 1,568                     | 2,926                    | 14,467                      | 14,252                     |
|               |           |                      | 278                    | 1,407                     | 2,415                    | 10,031                      | 14,084                     |
|               |           |                      | 2,583                  | 1,103                     | 1,512                    | 16,296                      | 19,404                     |
|               |           |                      | 379                    | 1,053                     | 3,402                    | 6,727                       | 26,495                     |
|               |           |                      | 323                    | 816                       | 5,474                    | 14,588                      |                            |
|               |           |                      |                        |                           | 4,383                    | 12,754                      |                            |
|               |           |                      |                        |                           | 2,526                    |                             |                            |
|               | <b>WT</b> |                      | <b>169 ±7.9 (n=3)</b>  | <b>239 ±27.2 (n=6)</b>    | <b>438 ±68.9 (n=3)</b>   | <b>623 ±57.4 (n=7)</b>      | <b>1,290 ±187.4 (n=6)</b>  |
|               |           | 155                  | 318                    | 374                       | 606                      | 1,016                       | 11,207                     |
|               |           | 171                  | 162                    | 575                       | 365                      | 926                         | 6,566                      |
|               |           | 182                  | 226                    | 364                       | 651                      | 1,070                       | 4,571                      |
|               |           |                      | 190                    |                           | 603                      | 974                         | 4,935                      |
|               |           |                      | 217                    |                           | 2,025                    | 1,931                       | 5,327                      |
|               |           |                      | 322                    |                           | 888                      | 1,825                       | 2,814                      |
|               |           |                      |                        |                           | 608                      |                             |                            |
|               |           |                      |                        |                           | 642                      |                             |                            |
|               |           |                      |                        |                           |                          |                             |                            |

Mean ±SEM (grey values: significant outliers according to Grubb's test; P<0.05)

\* Since the mean age of the end stage WT group was 26 months compared to 22 months in the APPPS1 mice, the mean value of CSF NfL for 22-month-old WT mice was interpolated (2,756 pg/mL) based on polynomial curve-fitting (4th degree).

**Supplementary Table 1.** CSF NfL values of APPPS1 mice and wildtype (WT) mice used to generate the curve in Fig. 1a.

## Member List of the Dominantly Inherited Alzheimer Network (DIAN)

| LastName        | First          | Affiliation                                                       | Email address                                                                                              |
|-----------------|----------------|-------------------------------------------------------------------|------------------------------------------------------------------------------------------------------------|
| Adams           | Sarah          | Washington University in St. Louis School of Medicine             | <a href="mailto:sladams@wustl.edu">sladams@wustl.edu</a>                                                   |
| Allegrì         | Ricardo        | Institute of Neurological Research Fleni, Buenos Aires, Argentina | <a href="mailto:rallegri@fleni.org.ar">rallegri@fleni.org.ar</a>                                           |
| Araki           | Aki            | Niigata University                                                | <a href="mailto:araki-aki@bri.niigata-u.ac.jp">araki-aki@bri.niigata-u.ac.jp</a>                           |
| Barthelemy      | Nicolas        | Washington University in St. Louis School of Medicine             | <a href="mailto:barthelemy.nicolas@wustl.edu">barthelemy.nicolas@wustl.edu</a>                             |
| Bateman         | Randall        | Washington University in St. Louis School of Medicine             | <a href="mailto:batemanr@wustl.edu">batemanr@wustl.edu</a>                                                 |
| Bechara         | Jacob          | Neuroscience Research Australia                                   | <a href="mailto:j.bechara@neura.edu.au">j.bechara@neura.edu.au</a>                                         |
| Benzinger       | Tammie         | Washington University in St. Louis School of Medicine             | <a href="mailto:benzinger@wustl.edu">benzinger@wustl.edu</a>                                               |
| Berman          | Sarah          | University of Pittsburgh                                          | <a href="mailto:bemans@upmc.edu">bemans@upmc.edu</a>                                                       |
| Bodge           | Courtney       | Brown University-Butler Hospital                                  | <a href="mailto:Cbodge@Butler.org">Cbodge@Butler.org</a>                                                   |
| Brandon         | Susan          | Washington University in St. Louis School of Medicine             | <a href="mailto:brandons@wustl.edu">brandons@wustl.edu</a>                                                 |
| Brooks          | William (Bill) | Neuroscience Research Australia                                   | <a href="mailto:w.brooks@NeuRA.edu.au">w.brooks@NeuRA.edu.au</a>                                           |
| Brosch          | Jared          | Indiana University                                                |                                                                                                            |
| Buck            | Jill           | Indiana University                                                | <a href="mailto:jilmbuck@iu.edu">jilmbuck@iu.edu</a>                                                       |
| Buckles         | Virginia       | Washington University in St. Louis School of Medicine             | <a href="mailto:bucklesv@wustl.edu">bucklesv@wustl.edu</a>                                                 |
| Carter          | Kathleen       | Emory University School of Medicine                               | <a href="mailto:emma.kathleen.carter@emory.edu">emma.kathleen.carter@emory.edu</a>                         |
| Cash            | Lisa           | Washington University in St. Louis School of Medicine             | <a href="mailto:cashi@wustl.edu">cashi@wustl.edu</a>                                                       |
| Chen            | Charlie        | Washington University in St. Louis School of Medicine             | <a href="mailto:chenc@wustl.edu">chenc@wustl.edu</a>                                                       |
| Chhatwal        | Jasmeer        | Brigham and Women's Hospital–Massachusetts General Hospital       | <a href="mailto:Chhatwal.Jasmeer@mqh.harvard.edu">Chhatwal.Jasmeer@mqh.harvard.edu</a>                     |
| Chrem           | Patricio       | Institute of Neurological Research Fleni, Buenos Aires, Argentina | <a href="mailto:pchremmendez@fleni.org.ar">pchremmendez@fleni.org.ar</a>                                   |
| Chua            | Jasmin         | Washington University in St. Louis School of Medicine             | <a href="mailto:chuaik@wustl.edu">chuaik@wustl.edu</a>                                                     |
| Chui            | Helena         | University of Southern California                                 | <a href="mailto:helena.chui@med.usc.edu">helena.chui@med.usc.edu</a>                                       |
| Cruchaga        | Carlos         | Washington University in St. Louis School of Medicine             | <a href="mailto:cruchagac@wustl.edu">cruchagac@wustl.edu</a>                                               |
| Day             | Gregory S      | Mayo Clinic Jacksonville                                          | <a href="mailto:Day.gregory@mayo.edu">Day.gregory@mayo.edu</a>                                             |
| De La Cruz      | Chrismary      | Columbia University                                               |                                                                                                            |
| Denner          | Darcy          | Washington University in St. Louis School of Medicine             | <a href="mailto:drdenner@wustl.edu">drdenner@wustl.edu</a>                                                 |
| Diffenbacher    | Anna           | German Center for Neurodegenerative Diseases (DZNE) Munich        | <a href="mailto:Anna.diffenbacher@dzne.de">Anna.diffenbacher@dzne.de</a>                                   |
| Dincer          | Aylin          | Washington University in St. Louis School of Medicine             | <a href="mailto:aylin.dincer@wustl.edu">aylin.dincer@wustl.edu</a>                                         |
| Donahue         | Tamara         | Washington University in St. Louis School of Medicine             | <a href="mailto:tammie@wustl.edu">tammie@wustl.edu</a>                                                     |
| Douglas         | Jane           | University College London                                         | <a href="mailto:jane.douglas@ucl.ac.uk">jane.douglas@ucl.ac.uk</a>                                         |
| Duong           | Duc            | Emory University School of Medicine                               | <a href="mailto:dduong@emory.edu">dduong@emory.edu</a>                                                     |
| Egido           | Noelia         | Institute of Neurological Research Fleni, Buenos Aires, Argentina | <a href="mailto:neqido@fleni.org.ar">neqido@fleni.org.ar</a>                                               |
| Esposito        | Bianca         | Icahn School of Medicine at Mount Sinai                           | <a href="mailto:bianca.esposito@mssm.edu">bianca.esposito@mssm.edu</a>                                     |
| Fagan           | Anne           | Washington University in St. Louis School of Medicine             | <a href="mailto:fanana@wustl.edu">fanana@wustl.edu</a>                                                     |
| Farlow          | Marty          | Indiana University                                                | <a href="mailto:mfarlow@iupui.edu">mfarlow@iupui.edu</a>                                                   |
| Feldman         | Becca          | Washington University in St. Louis School of Medicine             | <a href="mailto:rebeccat@wustl.edu">rebeccat@wustl.edu</a>                                                 |
| Fitzpatrick     | Colleen        | Brigham and Women's Hospital-Massachusetts                        | <a href="mailto:cdfitzpatrick@bwh.harvard.edu">cdfitzpatrick@bwh.harvard.edu</a>                           |
| Flores          | Shaney         | Washington University in St. Louis School of Medicine             | <a href="mailto:sflores@wustl.edu">sflores@wustl.edu</a>                                                   |
| Fox             | Nick           | University College London                                         | <a href="mailto:n.fox@ucl.ac.uk">n.fox@ucl.ac.uk</a>                                                       |
| Franklin        | Erin           | Washington University in St. Louis School of Medicine             | <a href="mailto:efranklin@wustl.edu">efranklin@wustl.edu</a>                                               |
| Friedrichsen    | Nelly          | Washington University in St. Louis School of Medicine             | <a href="mailto:n.joseph@wustl.edu">n.joseph@wustl.edu</a>                                                 |
| Fujii           | Hisako         | Osaka City University                                             | <a href="mailto:hfuji@med.osaka-cu.ac.jp">hfujii@med.osaka-cu.ac.jp</a>                                    |
| Gardener        | Samantha       | Edith Cowan University, Perth                                     | <a href="mailto:s.gardener@ecu.edu.au">s.gardener@ecu.edu.au</a>                                           |
| Ghetti          | Bernardino     | Indiana University                                                | <a href="mailto:bghetti@iupui.edu">bghetti@iupui.edu</a>                                                   |
| Goate           | Alison         | Icahn School of Medicine at Mount Sinai                           | <a href="mailto:alison.goate@mssm.edu">alison.goate@mssm.edu</a>                                           |
| Goldberg        | Sarah          | University of Pittsburgh                                          | <a href="mailto:goldbergs2@upmc.edu">goldbergs2@upmc.edu</a>                                               |
| Goldman         | Jill           | Columbia University                                               | <a href="mailto:JG2673@cumc.columbia.edu">JG2673@cumc.columbia.edu</a>                                     |
| Gonzalez        | Alyssa         | Washington University in St. Louis School of Medicine             | <a href="mailto:alyssa.gonzales@wustl.edu">alyssa.gonzales@wustl.edu</a>                                   |
| Gordon          | Brian          | Washington University in St. Louis School of Medicine             | <a href="mailto:baggordon@wustl.edu">baggordon@wustl.edu</a>                                               |
| Gräber-Sultan   | Susanne        | DZNE-Tübingen                                                     | <a href="mailto:susanne.graeber-sultan@dzne.de">susanne.graeber-sultan@dzne.de</a>                         |
| Graff-Radford   | Neill          | Mayo Clinic Jacksonville                                          | <a href="mailto:grafradford.neill@mayo.edu">grafradford.neill@mayo.edu</a>                                 |
| Graham          | Morgan         | Mayo Clinic Jacksonville                                          | <a href="mailto:Graham.Morgan@mayo.edu">Graham.Morgan@mayo.edu</a>                                         |
| Gray            | Julia          | Washington University in St. Louis School of Medicine             | <a href="mailto:gray@wustl.edu">gray@wustl.edu</a>                                                         |
| Gremminger      | Emily          | Washington University in St. Louis School of Medicine             | <a href="mailto:egremminger@wustl.edu">egremminger@wustl.edu</a>                                           |
| Grilo           | Miguel         | University College London                                         | <a href="mailto:m.grilo@ucl.ac.uk">m.grilo@ucl.ac.uk</a>                                                   |
| Groves          | Alex           | Washington University in St. Louis School of Medicine             | <a href="mailto:amgroves@wustl.edu">amgroves@wustl.edu</a>                                                 |
| Haass           | Christian      | Ludwig-Maximilians University - Munich                            | <a href="mailto:Christian.Haass@mail03.med.uni-muenchen.de">Christian.Haass@mail03.med.uni-muenchen.de</a> |
| Häsler          | Lisa           | German Center for Neurodegenerative Diseases (DZNE), Tübingen     | <a href="mailto:Lisa.Haesler@dzne.de">Lisa.Haesler@dzne.de</a>                                             |
| Hassenstab      | Jason          | Washington University in St. Louis School of Medicine             | <a href="mailto:hassenstabi@wustl.edu">hassenstabi@wustl.edu</a>                                           |
| Hellm           | Cortaiga       | Washington University in St. Louis School of Medicine             | <a href="mailto:cortaiga.hellm@wustl.edu">cortaiga.hellm@wustl.edu</a>                                     |
| Herries         | Elizabeth      | Washington University in St. Louis School of Medicine             | <a href="mailto:e.herries@wustl.edu">e.herries@wustl.edu</a>                                               |
| Hoechst-Swisher | Laura          | Washington University in St. Louis School of Medicine             | <a href="mailto:goodl@wustl.edu">goodl@wustl.edu</a>                                                       |
| Hofmann         | Anna           | German Center for Neurodegenerative Diseases (DZNE), Tübingen     | <a href="mailto:Anna.Hofmann@med.uni-tuebingen.de">Anna.Hofmann@med.uni-tuebingen.de</a>                   |
| Holtzman        | David          | Washington University in St. Louis School of Medicine             | <a href="mailto:holtzman@wustl.edu">holtzman@wustl.edu</a>                                                 |
| Hornbeck        | Russ           | Washington University in St. Louis School of Medicine             | <a href="mailto:russ@wustl.edu">russ@wustl.edu</a>                                                         |
| Igor            | Yakushev       | German Center for Neurodegenerative Diseases (DZNE) Munich        | <a href="mailto:lgor.yakushev@tum.de">lgor.yakushev@tum.de</a>                                             |
| Ihara           | Ryoko          | Tokyo University                                                  | <a href="mailto:ihara-ky@umin.ac.jp">ihara-ky@umin.ac.jp</a>                                               |
| Ikeuchi         | Takeshi        | Niigata University                                                | <a href="mailto:ikeuchi@bri.niigata-u.ac.jp">ikeuchi@bri.niigata-u.ac.jp</a>                               |
| Ikonomic        | Snezana        | University of Pittsburgh                                          | <a href="mailto:ikonomic@upmc.edu">ikonomic@upmc.edu</a>                                                   |
| Ishii           | Kenji          | Niigata University/Tokyo University                               | <a href="mailto:ishii@pet.tmg.or.jp">ishii@pet.tmg.or.jp</a>                                               |
| Jack            | Clifford       | Mayo Clinic Rochester                                             | <a href="mailto:jack.clifford@m Mayo.edu">jack.clifford@m Mayo.edu</a>                                     |
| Jerome          | Gina           | Washington University in St. Louis School of Medicine             | <a href="mailto:ginajerome@wustl.edu">ginajerome@wustl.edu</a>                                             |
| Johnson         | Erik           | Emory University School of Medicine                               | <a href="mailto:erik.johnson@emory.edu">erik.johnson@emory.edu</a>                                         |
| Jucker          | Mathias        | German Center for Neurodegenerative Diseases (DZNE), Tübingen     | <a href="mailto:mathias.jucker@uni-tuebingen.de">mathias.jucker@uni-tuebingen.de</a>                       |
| Karch           | Celeste        | Washington University in St. Louis School of Medicine             | <a href="mailto:karchc@wustl.edu">karchc@wustl.edu</a>                                                     |
| Käser           | Stephan        | German Center for Neurodegenerative Diseases (DZNE), Tübingen     | <a href="mailto:Stephan.kaeser@uni-tuebingen.de">Stephan.kaeser@uni-tuebingen.de</a>                       |
| Kasuga          | Kensaku        | Niigata University                                                | <a href="mailto:ken39@bri.niigata-u.ac.jp">ken39@bri.niigata-u.ac.jp</a>                                   |
| Keefe           | Sarah          | Washington University in St. Louis School of Medicine             | <a href="mailto:sarahkeefe@wustl.edu">sarahkeefe@wustl.edu</a>                                             |
| Klunk           | William (Bill) | University of Pittsburgh                                          | <a href="mailto:klunkwe@gmail.com">klunkwe@gmail.com</a>                                                   |

|                   |            |                                                               |                                                                                                                |
|-------------------|------------|---------------------------------------------------------------|----------------------------------------------------------------------------------------------------------------|
| Koeppel           | Robert     | University of Michigan                                        | <a href="mailto:koeppel@umich.edu">koeppel@umich.edu</a>                                                       |
| Koudelis          | Deb        | Washington University in St. Louis School of Medicine         | <a href="mailto:delanod@wustl.edu">delanod@wustl.edu</a>                                                       |
| Kuder-Buletta     | Elke       | German Center for Neurodegenerative Diseases (DZNE), Tübingen | <a href="mailto:elke.kuder-buletta@dzne.de">elke.kuder-buletta@dzne.de</a>                                     |
| Laske             | Christoph  | German Center for Neurodegenerative Diseases (DZNE), Tübingen | <a href="mailto:christoph.laske@med.uni-tuebingen.de">christoph.laske@med.uni-tuebingen.de</a>                 |
| Levey             | Allan      | Emory University School of Medicine                           | <a href="mailto:alevey@emory.edu">alevey@emory.edu</a>                                                         |
| Levin             | Johannes   | German Center for Neurodegenerative Diseases (DZNE) Munich    | <a href="mailto:Johannes.Levin@med.uni-muenchen.de">Johannes.Levin@med.uni-muenchen.de</a>                     |
| Li                | Yan        | Washington University in St. Louis School of Medicine         | <a href="mailto:yanli833@wustl.edu">yanli833@wustl.edu</a>                                                     |
| Lopez             | Oscar      | University of Pittsburgh                                      | <a href="mailto:lopezol@upmc.edu">lopezol@upmc.edu</a>                                                         |
| Marsh             | Jacob      | Washington University in St. Louis School of Medicine         | <a href="mailto:jacobmarsh@wustl.edu">jacobmarsh@wustl.edu</a>                                                 |
| Martinez          | Rita       | Washington University in St. Louis School of Medicine         | <a href="mailto:Ritamartinez@wustl.edu">Ritamartinez@wustl.edu</a>                                             |
| Martins           | Ralph      | Edith Cowan University                                        | <a href="mailto:r.martins@ecu.edu.au">r.martins@ecu.edu.au</a>                                                 |
| Mason             | Neal Scott | University of Pittsburgh Medical Center                       | <a href="mailto:masonss@upmc.edu">masonss@upmc.edu</a>                                                         |
| Masters           | Colin      | University of Melbourne                                       | <a href="mailto:c.masters@unimelb.edu.au">c.masters@unimelb.edu.au</a>                                         |
| Mawuenyega        | Kwasi      | Washington University in St. Louis School of Medicine         | <a href="mailto:mawuenyegak@wustl.edu">mawuenyegak@wustl.edu</a>                                               |
| McCullough        | Austin     | Washington University in St. Louis School of Medicine         | <a href="mailto:amccullough@wustl.edu">amccullough@wustl.edu</a>                                               |
| McDade            | Eric       | Washington University in St. Louis School of Medicine         | <a href="mailto:ericmcdade@wustl.edu">ericmcdade@wustl.edu</a>                                                 |
| Mejia             | Arlene     | Columbia University                                           | <a href="mailto:am4717@cumc.columbia.edu">am4717@cumc.columbia.edu</a>                                         |
| Morenas-Rodriguez | Estrella   | Ludwig-Maximilians University, Munich                         | <a href="mailto:Estrella.Morenas-Rodriguez@dzne.d">Estrella.Morenas-Rodriguez@dzne.d</a>                       |
| Morris            | John       | Washington University in St. Louis School of Medicine         | <a href="mailto:jcmorris@wustl.edu">jcmorris@wustl.edu</a>                                                     |
| MountzMD          | James      | University of Pittsburgh                                      | <a href="mailto:mountzjm@upmc.edu">mountzjm@upmc.edu</a>                                                       |
| Mummery           | Cath       | University College London                                     | <a href="mailto:c.mummery@ucl.ac.uk">c.mummery@ucl.ac.uk</a>                                                   |
| Nadkarni          | Neelesh    | University of Pittsburgh                                      | <a href="mailto:nadkarnik@upmc.edu">nadkarnik@upmc.edu</a>                                                     |
| Nagamatsu         | Akemi      | Tokyo University                                              | <a href="mailto:mail:akm77-ky@umin.ac.jp">mail:akm77-ky@umin.ac.jp</a>                                         |
| Neimeyer          | Katie      | Columbia University                                           | <a href="mailto:kn2416@cumc.columbia.edu">kn2416@cumc.columbia.edu</a>                                         |
| Niimi             | Yoshiki    | Tokyo University                                              | <a href="mailto:niimiy-crc@h.u-tokyo.ac.jp">niimiy-crc@h.u-tokyo.ac.jp</a>                                     |
| Noble             | James      | Columbia University                                           | <a href="mailto:in2054@columbia.edu">in2054@columbia.edu</a>                                                   |
| Norton            | Joanne     | Washington University in St. Louis School of Medicine         | <a href="mailto:nortonj@wustl.edu">nortonj@wustl.edu</a>                                                       |
| Nuscher           | Brigitte   | Ludwig-Maximilians University, Munich                         | <a href="mailto:Brigitte.Nuscher@mail03.med.uni-muenchen.de">Brigitte.Nuscher@mail03.med.uni-muenchen.de</a>   |
| O'Connor          | Antoinette | University College London                                     | <a href="mailto:antoinette.o'connor@ucl.ac.uk">antoinette.o'connor@ucl.ac.uk</a>                               |
| Obermüller        | Ulricke    | Hertie Institute for Clinical Brain Research                  | <a href="mailto:ulrike.obermueller@klinikum.uni-tuebingen.de">ulrike.obermueller@klinikum.uni-tuebingen.de</a> |
| Patira            | Riddhi     | University of Pittsburgh                                      | <a href="mailto:patirar@upmc.edu">patirar@upmc.edu</a>                                                         |
| Perrin            | Richard    | Washington University in St. Louis School of Medicine         | <a href="mailto:rperrin@wustl.edu">rperrin@wustl.edu</a>                                                       |
| Ping              | Lingyan    | Emory University School of Medicine                           | <a href="mailto:lingyan.ping@emory.edu">lingyan.ping@emory.edu</a>                                             |
| Preisiche         | Oliver     | German Center for Neurodegenerative Diseases (DZNE), Tübingen | <a href="mailto:Oliver.Preisiche@med.uni-tuebingen.de">Oliver.Preisiche@med.uni-tuebingen.de</a>               |
| Renton            | Alan       | Icahn School of Medicine at Mount Sinai                       | <a href="mailto:alan.renton@mssm.edu">alan.renton@mssm.edu</a>                                                 |
| Ringman           | John       | University of Southern California                             | <a href="mailto:john.ringman@med.usc.edu">john.ringman@med.usc.edu</a>                                         |
| Salloway          | Stephen    | Brown University-Butler Hospital                              | <a href="mailto:SSalloway@Butler.org">SSalloway@Butler.org</a>                                                 |
| Schofield         | Peter      | Neuroscience Research Australia                               | <a href="mailto:p.schofield@neura.edu.au">p.schofield@neura.edu.au</a>                                         |
| Senda             | Michio     | Osaka City University                                         | <a href="mailto:michio_senda@kcho.jp">michio_senda@kcho.jp</a>                                                 |
| Seyfried          | Nick       | Emory University School of Medicine                           | <a href="mailto:nseyfri@emory.edu">nseyfri@emory.edu</a>                                                       |
| Shady             | Kristine   | Washington University in St. Louis School of Medicine         | <a href="mailto:kesh238@g.uky.edu">kesh238@g.uky.edu</a>                                                       |
| Shimada           | Hiroyuki   | Osaka City University                                         | <a href="mailto:h.shimada@med.osaka-cu.ac.jp">h.shimada@med.osaka-cu.ac.jp</a>                                 |
| Sigurdson         | Wendy      | Washington University in St. Louis School of Medicine         | <a href="mailto:sigurdsonw@wustl.edu">sigurdsonw@wustl.edu</a>                                                 |
| Smith             | Jennifer   | Washington University in St. Louis School of Medicine         | <a href="mailto:smith.jennifer@wustl.edu">smith.jennifer@wustl.edu</a>                                         |
| Smith             | Lori       | University of Pittsburgh                                      | <a href="mailto:macedonials@upmc.edu">macedonials@upmc.edu</a>                                                 |
| Snitz             | Beth       | University of Pittsburgh                                      | <a href="mailto:snitbe@upmc.edu">snitbe@upmc.edu</a>                                                           |
| Sohrabi           | Hamid      | Edith Cowan University                                        | <a href="mailto:h.sohrabi@ecu.edu.au">h.sohrabi@ecu.edu.au</a>                                                 |
| Stephens          | Sochenda   | Mayo Clinic Jacksonville                                      | <a href="mailto:Stephens.Sochenda@mayo.edu">Stephens.Sochenda@mayo.edu</a>                                     |
| Taddei            | Kevin      | Edith Cowan University                                        | <a href="mailto:k.taddei@ecu.edu.au">k.taddei@ecu.edu.au</a>                                                   |
| Thompson          | Sarah      | University of Pittsburgh                                      | <a href="mailto:thompsons24@upmc.edu">thompsons24@upmc.edu</a>                                                 |
| Vöglein           | Jonathan   | German Center for Neurodegenerative Diseases (DZNE) Munich    | <a href="mailto:Jonathan.voeglein@med.uni-muenchen.de">Jonathan.voeglein@med.uni-muenchen.de</a>               |
| Wang              | Peter      | Washington University in St. Louis School of Medicine         | <a href="mailto:quogiao@wustl.edu">quogiao@wustl.edu</a>                                                       |
| Wang              | Qing       | Washington University in St. Louis School of Medicine         | <a href="mailto:wangqing@wustl.edu">wangqing@wustl.edu</a>                                                     |
| Weamer            | Elise      | University of Pittsburgh                                      | <a href="mailto:weamerea@upmc.edu">weamerea@upmc.edu</a>                                                       |
| Xiong             | Chengjie   | Washington University in St. Louis School of Medicine         | <a href="mailto:chengjie@wustl.edu">chengjie@wustl.edu</a>                                                     |
| Xu                | Jinbin     | Washington University in St. Louis School of Medicine         | <a href="mailto:_jinbinxu@wustl.edu">_jinbinxu@wustl.edu</a>                                                   |
| Xu                | Xiong      | Washington University in St. Louis School of Medicine         | <a href="mailto:xxu@wustl.edu">xxu@wustl.edu</a>                                                               |
