# Supplementary material for: Experimental evidence for temporal uncoupling of brain Aβ deposition and neurodegenerative sequelae
Source: PubMed Central journal article supplement (PMC9705543; doi:10.1038/s41467-022-34538-5), 2022-11-28
Supplement: 41467_2022_34538_MOESM2_ESM.pdf [file 41467_2022_34538_MOESM2_ESM.pdf]

## **Description of Additional Supplementary Files**

Supplementary Data 1 and 2:

Protein label-free quantification of CSF samples from 21.5 months old APPPS1 and WT mice with and without BACE inhibition (for mouse IDs see Supplementary Data 1; for Mass-Spec results see Supplementary Data 2). The protein LFQ intensities were log<sub>2</sub> transformed. A one-way ANOVA was applied to evaluate significant differences between the experimental groups. Afterwards, two-sided T-tests were applied between the individual groups. A permutation based FDR estimation ( $p=0.05$ ;  $s_0=0.1$ ) was applied to correct for multiple hypotheses.

Source File

Reporting Summary
